# Supplementary material for: Capecitabine and Temozolomide versus FOLFIRI in RAS-Mutated, MGMT-Methylated Metastatic Colorectal Cancer
Source: Oxford University Press journal article supplement (doi:10.1158/1078-0432.ccr-19-3024), 2019-11-18
Supplement: 10780432ccr193024-sup-229064_2_supp_5875936_q0yvc3.docx [file 10780432ccr193024-sup-229064_2_supp_5875936_q0yvc3.docx]

**Supplementary Table S2**. Post-progression therapies according to treatment arm.

| **Agent** | **Arm A**  **n = 43 (%)** | **Arm B**  **n = 43 (%)** |
| --- | --- | --- |
| Irinotecan | 22 (51) | 5 (12) |
| Temozolomide (off-label) | 0 (0) | 13 (30) |
| Oxaliplatin | 1 (2) | 6 (14) |
| Fluoropyrimidine | 22 (51) | 12 (30) |
| Bevacizumab/Aflibercept | 7 (16) | 4 (9) |
| Regorafenib | 4 (9) | 12 (30) |
| Trifluridine/Tipiracil | 7 (16) | 7 (16) |
